# Supplementary material for: Ultrasensitive enrichment of phosphopeptides with Ti4+ immobilized SiO2 graphene-like multilayer nanosheets
Source: Royal Society of Chemistry journal article supplement (doi:10.1039/c6an00361c), 2016-01-01
Supplement: c6an00361c1.pdf [file c6an00361c1.pdf]

## Supplementary Information

### Ultrasensitive Enrichment of Phosphopeptides by $\text{Ti}^{4+}$ Immobilized $\text{SiO}_2$ Graphene-like Multilayers Nanosheets

Dongpo Xu, Mingxia Gao, Chunhui Deng and Xiangmin Zhang\*

Department of Chemistry and Institutes of Biomedical Sciences, Fudan University, Shanghai 200433, China

E-mail: xmzhang@fudan.edu.cn

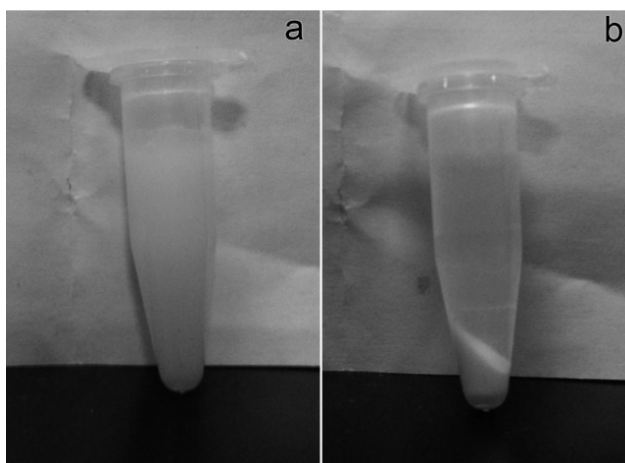

Figure S1. The  $\text{Ti}^{4+}$  immobilized  $\text{SiO}_2$  graphene-like multilayers nanosheets solution was (a) before and (b) after centrifuged under  $1000 \text{ r min}^{-1}$  in less than 1 minute.

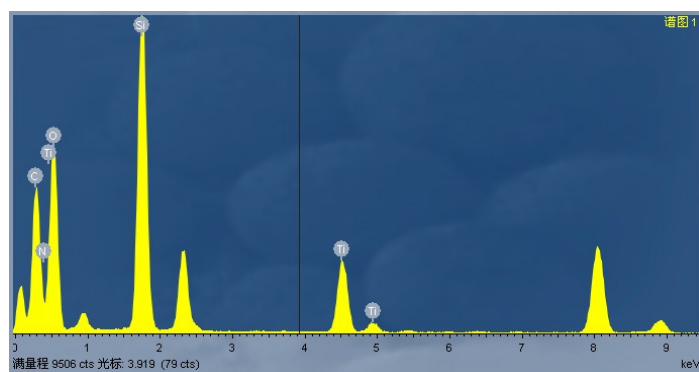

| Element | Weight percentage | Atomic percentage |
|---------|-------------------|-------------------|
| C K     | 24.56             | 35.06             |
| N K     | 14.84             | 18.17             |
| O K     | 25.75             | 27.59             |
| Si K    | 26.52             | 16.19             |
| Ti K    | 8.33              | 2.98              |
| Tatol   | 100.00            |                   |

Figure S2. The energy dispersive X-ray (EDX) spectrum of the  $\text{Ti}^{4+}$  immobilized  $\text{SiO}_2$  graphene-like multilayers nanosheets.

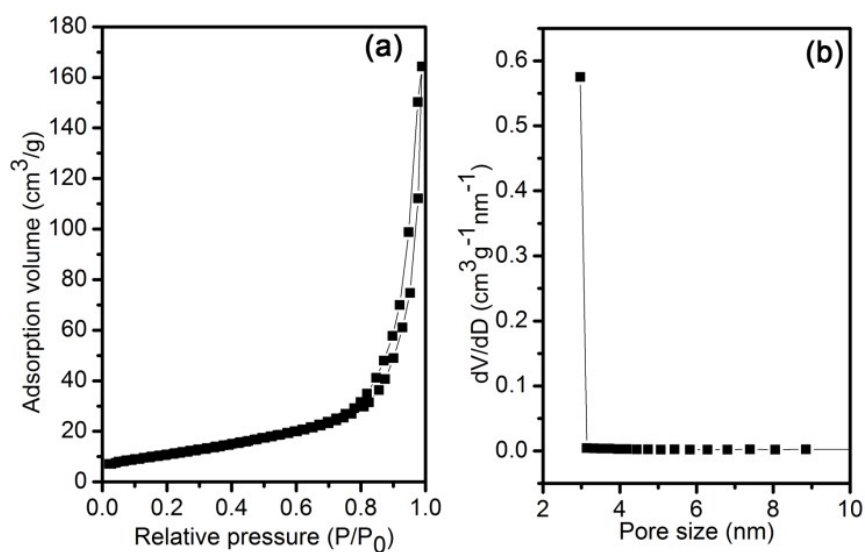

Figure S3. (a)  $\text{N}_2$  isotherms and (b) pore-size distribution of the  $\text{Ti}^{4+}$  immobilized  $\text{SiO}_2$  graphene-like multilayers nanosheets.

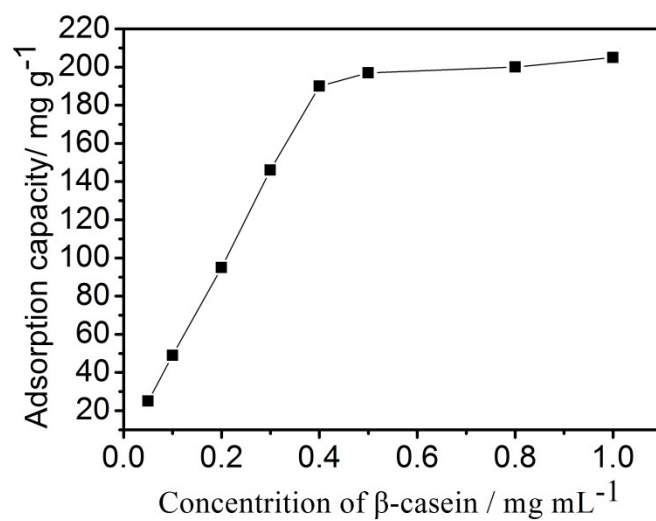

Figure S4. Adsorption capacity isotherm of phosphopeptides from  $\beta$ -casein by the  $\text{Ti}^{4+}$  immobilized  $\text{SiO}_2$  graphene-like multilayers nanosheets.

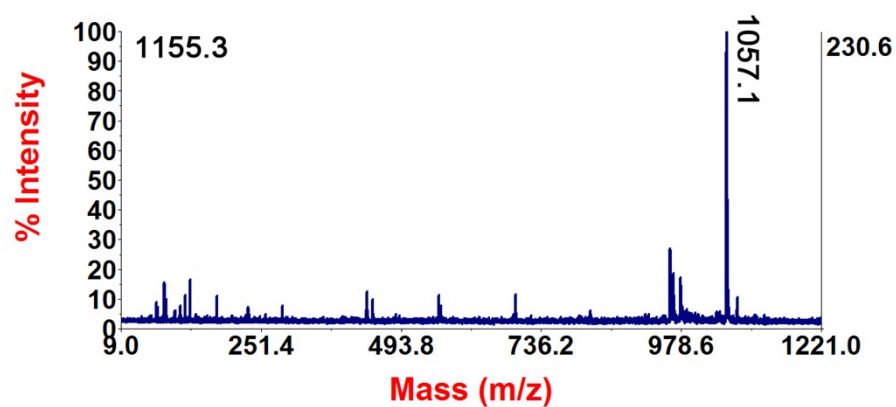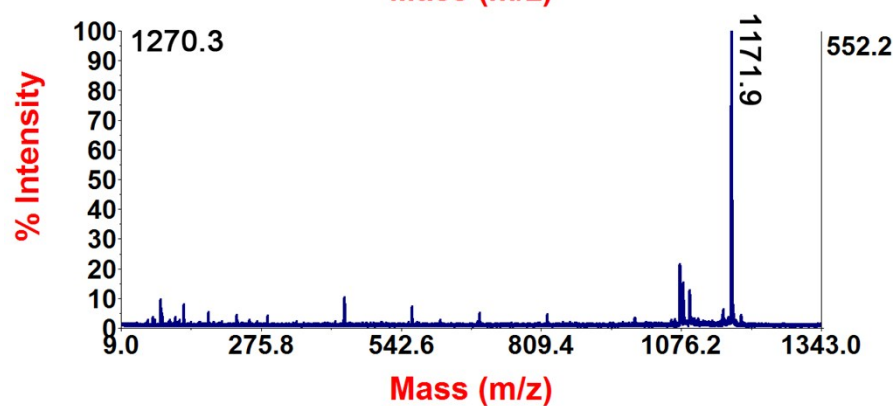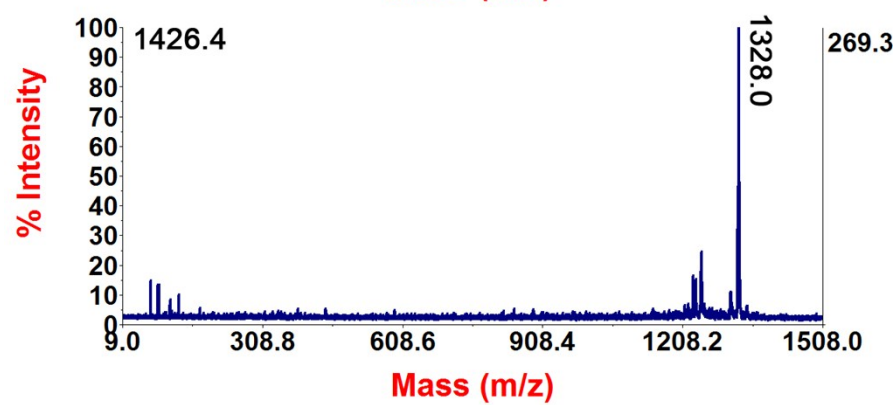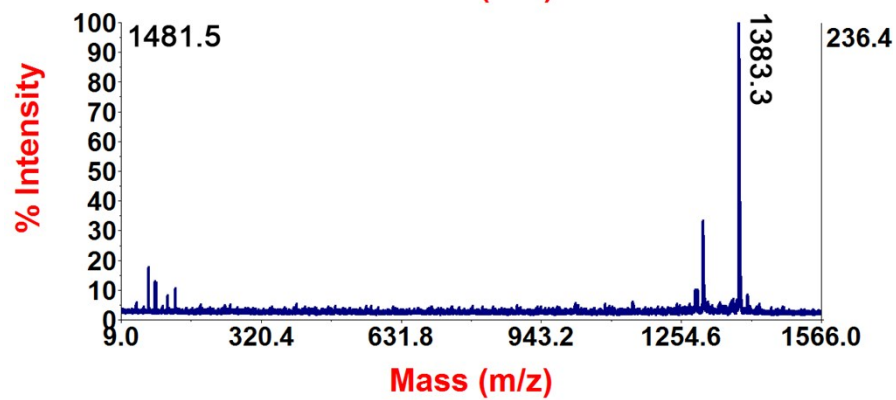

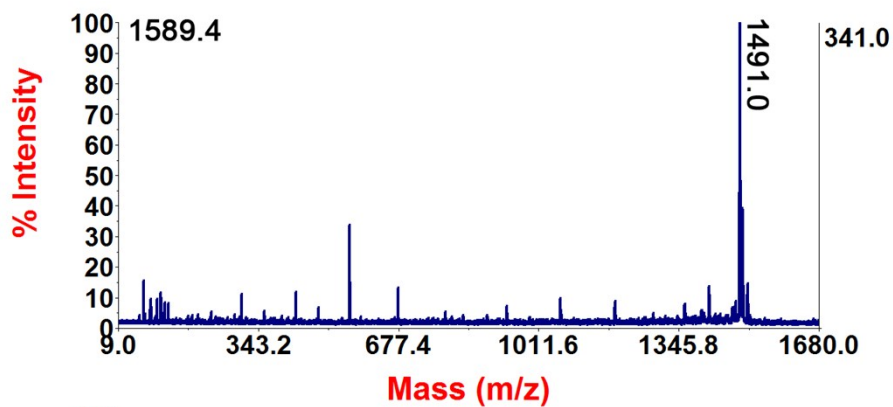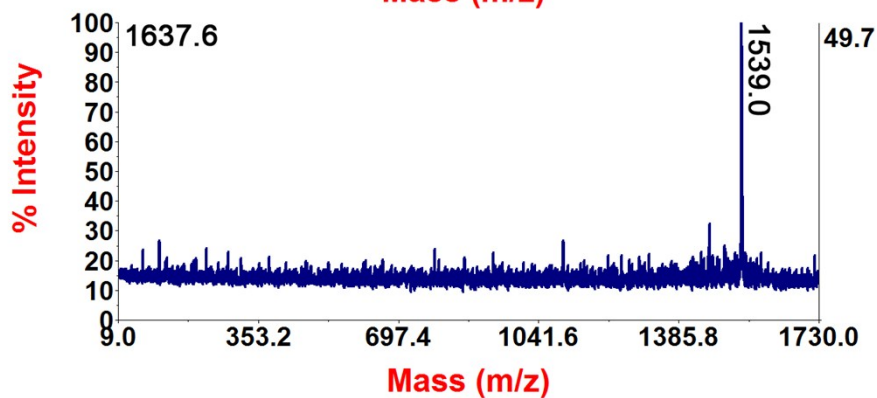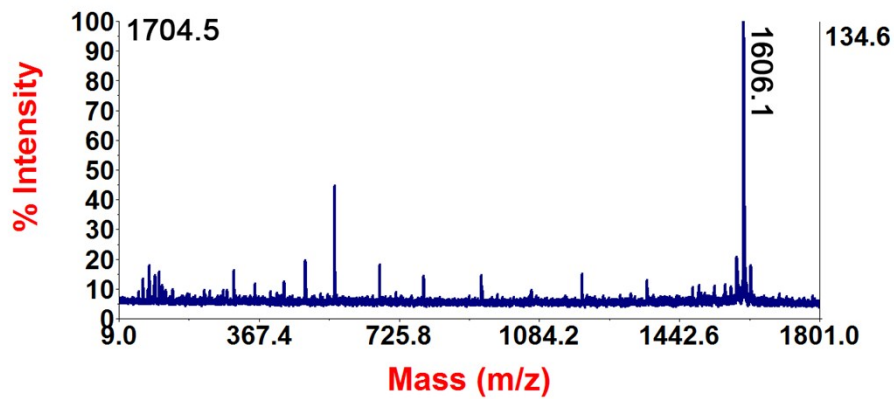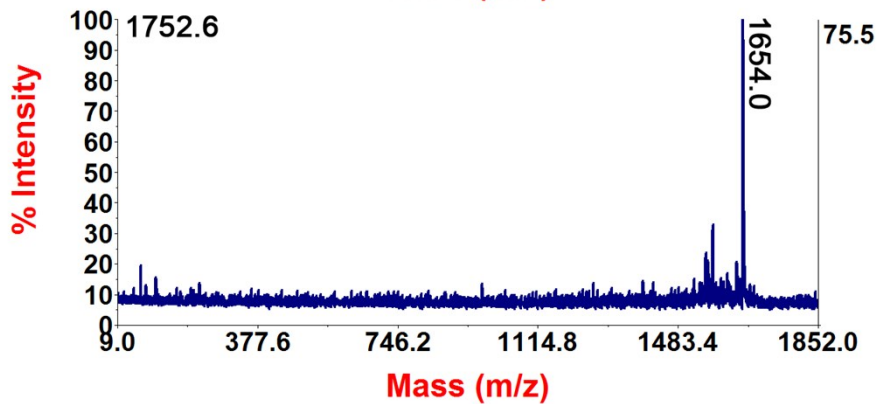

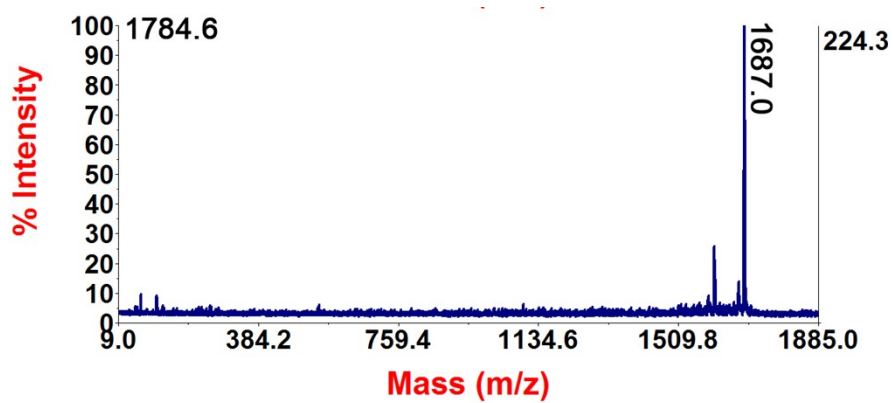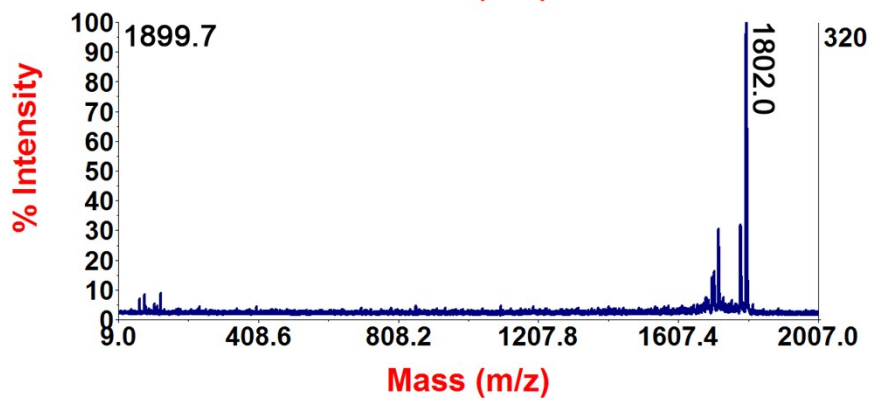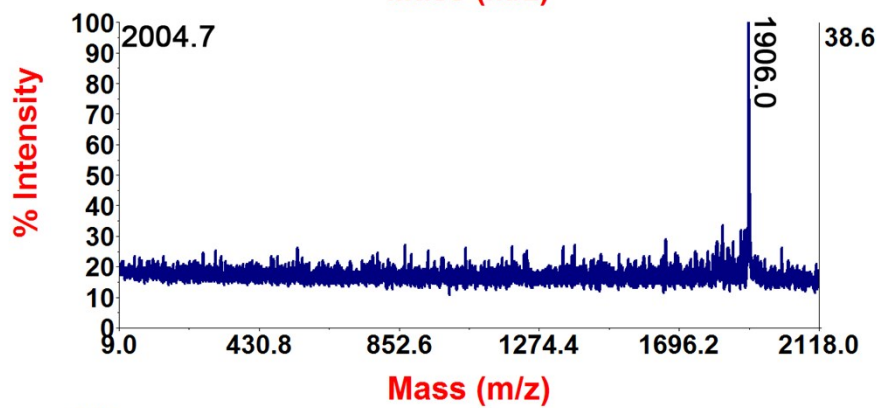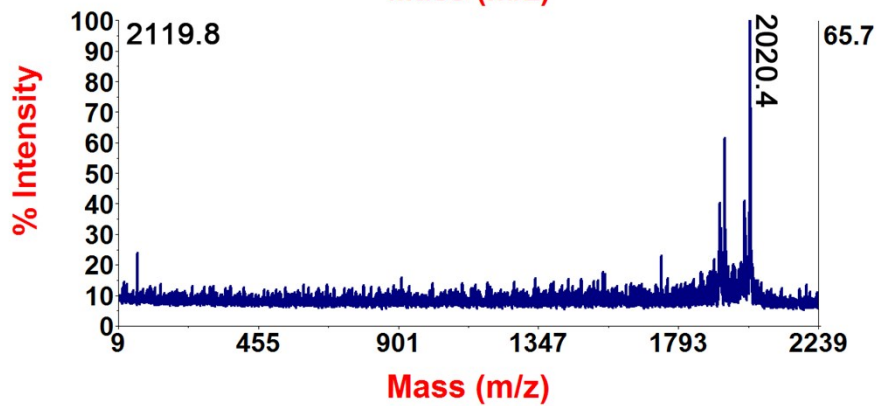

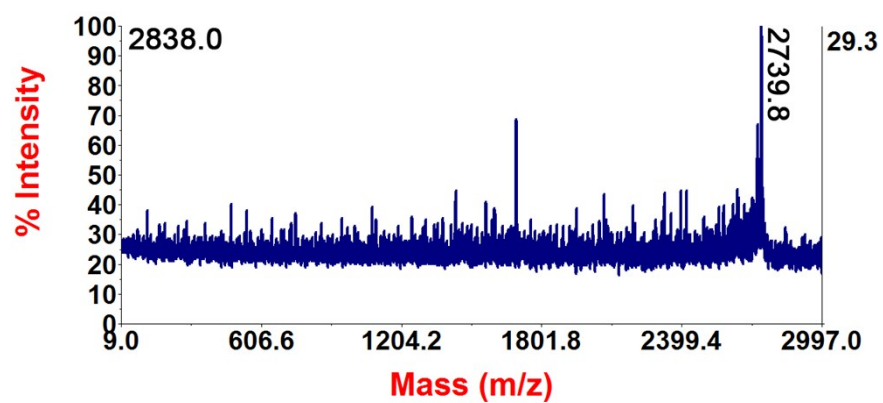

Figure S5. MALDI-TOF/TOF MS/MS spectra of thirteen endogenous phosphopeptides from healthy human salica with enrichment by using the  $\text{Ti}^{4+}$  immobilized  $\text{SiO}_2$  graphene-like multilayers nanosheets.
